# Supplementary material for: Development and pyrosequencing analysis of an in-vitro oral biofilm model
Source: PubMed Central journal article supplement (PMC4332733; doi:10.1186/s12866-015-0364-1), 2015-02-10

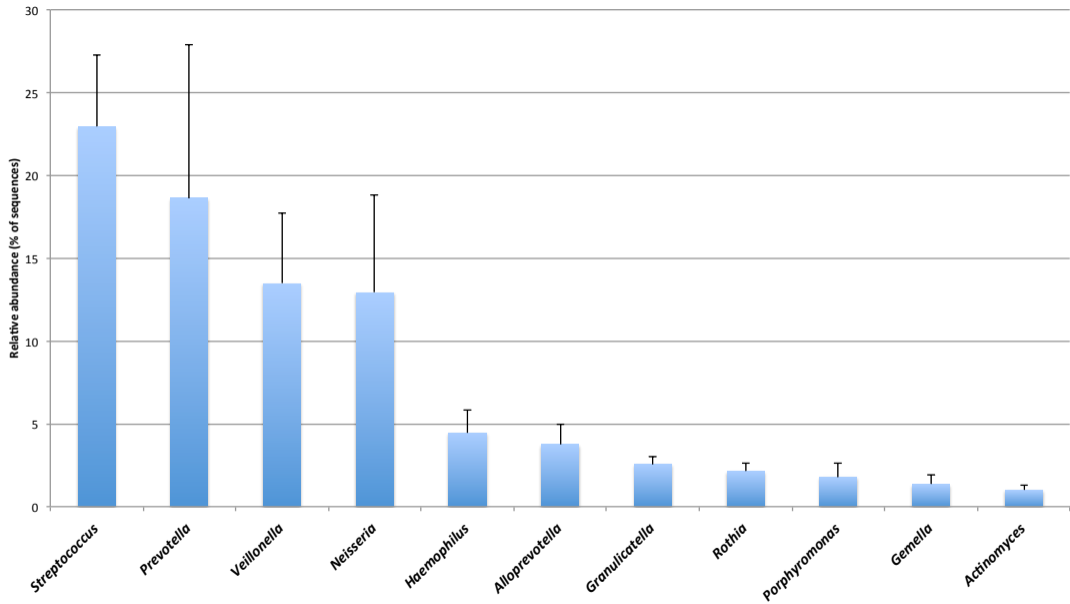

Supplement: 12866_2015_364_MOESM4_ESM.pdf [file 12866_2015_364_MOESM4_ESM.pdf]
